# Supplementary material for: Fabrication of 3D macroporous Fe3O4–GO–Ni through a ‘nano-reinforced concrete’ method in the application of flexible supercapacitors
Source: Royal Society of Chemistry journal article supplement (doi:10.1039/d3dt01515g), 2023-01-01
Supplement: d3dt01515g1.pdf [file d3dt01515g1.pdf]

# Fabrication of 3D macroporous $\text{Fe}_3\text{O}_4$ -GO-Ni through ‘nano-reinforced concrete’ method in application of flexible supercapacitors

## Supporting information

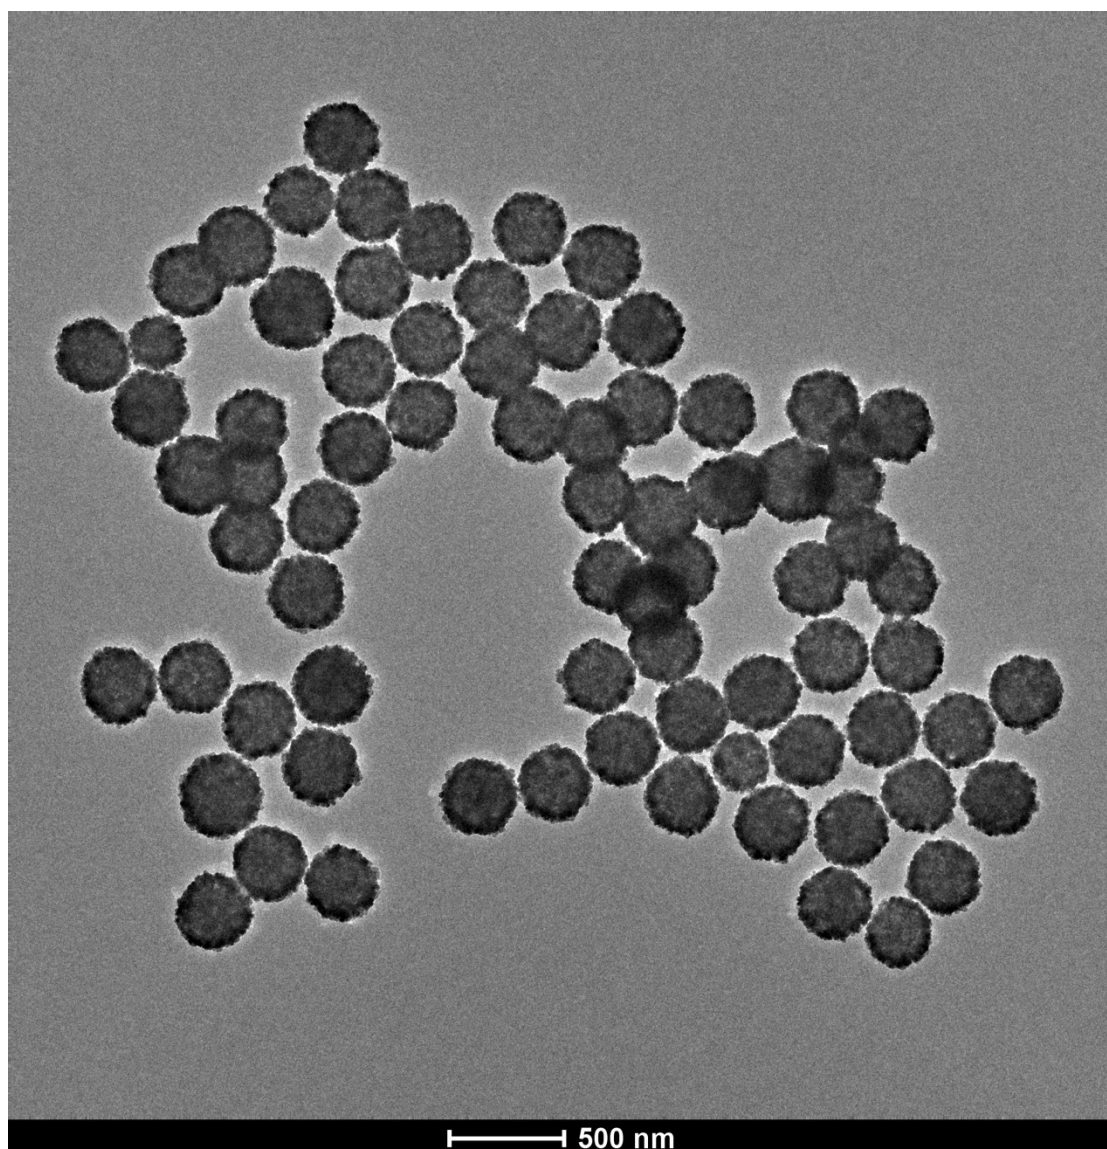

Figure S1 TEM image of hollow  $\text{Fe}_3\text{O}_4$  microspheres.

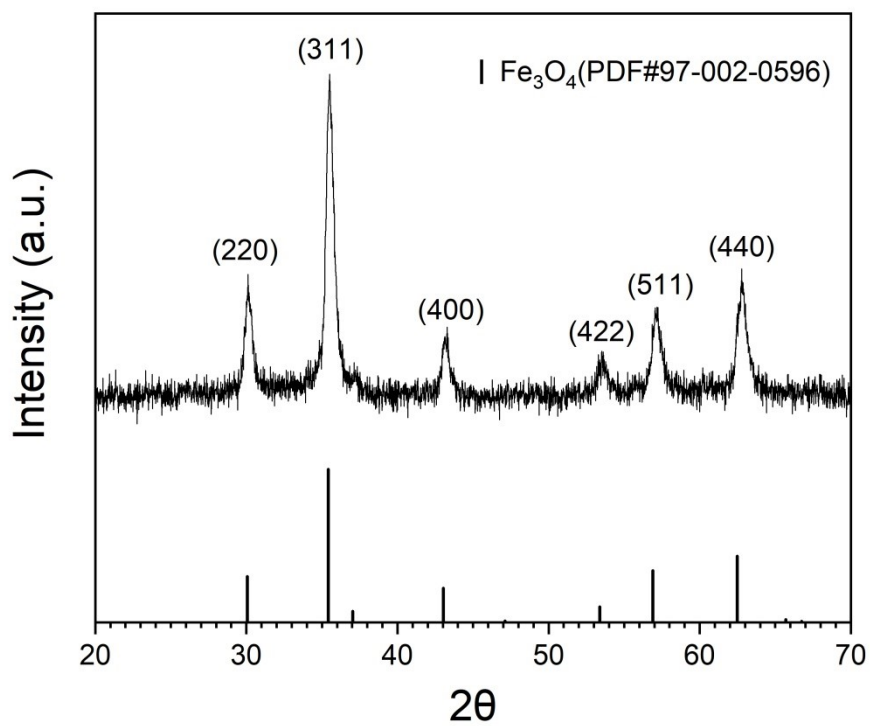

Figure S2 XRD pattern of hollow  $\text{Fe}_3\text{O}_4$  microspheres.

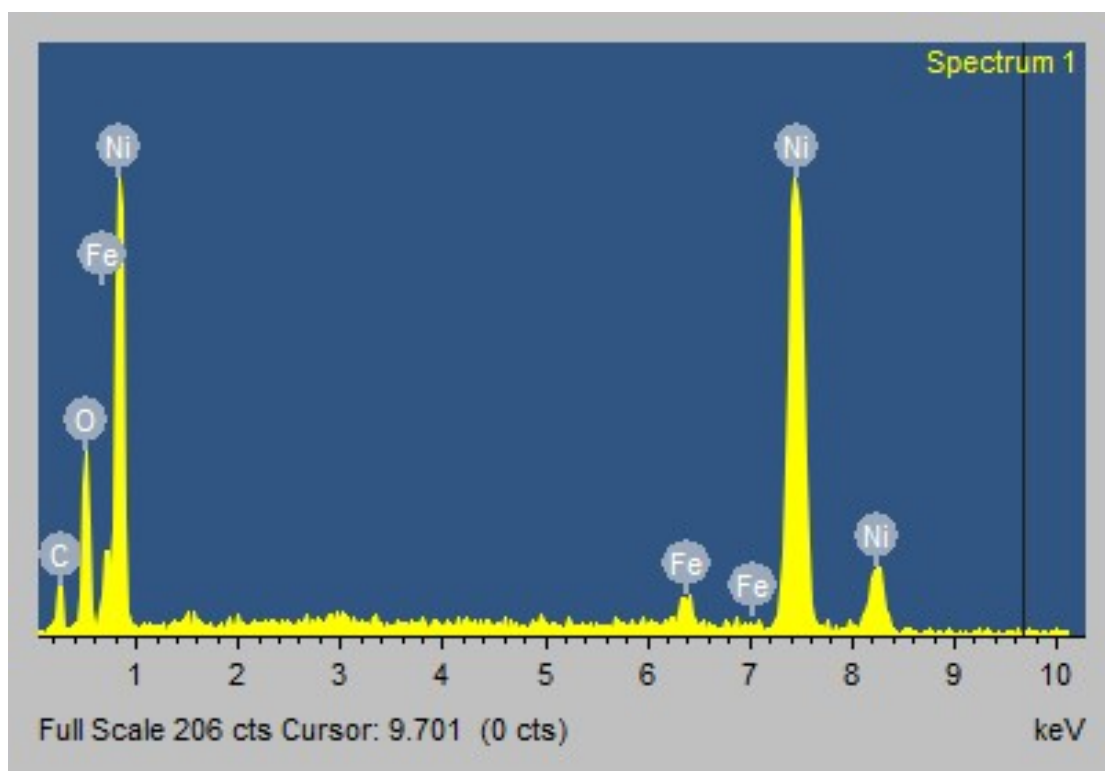

Figure S3 EDX result of  $\text{Fe}_3\text{O}_4\text{-GO-Ni@}$ cotton threads.

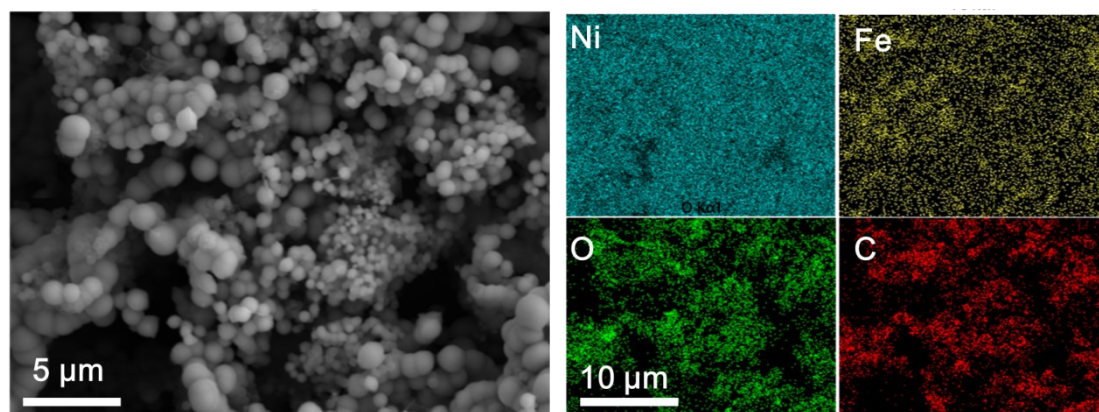

Figure S4 Images of EDX element mapping characterization of  $\text{Fe}_3\text{O}_4\text{-GO-Ni@}$ cotton threads.

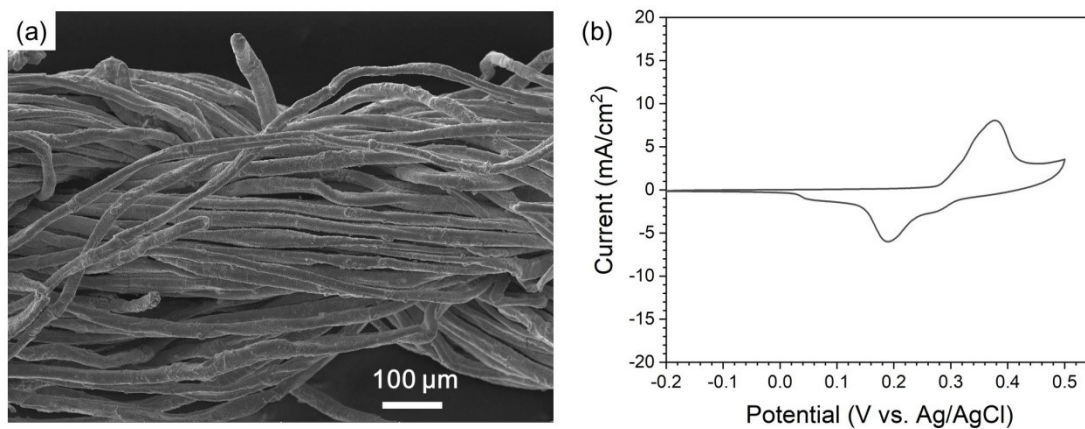

Figure S5 (a) the SEM image and (b) the CV curve of the Ni@cotton electrodes at the scan rate of 5 mV/s.

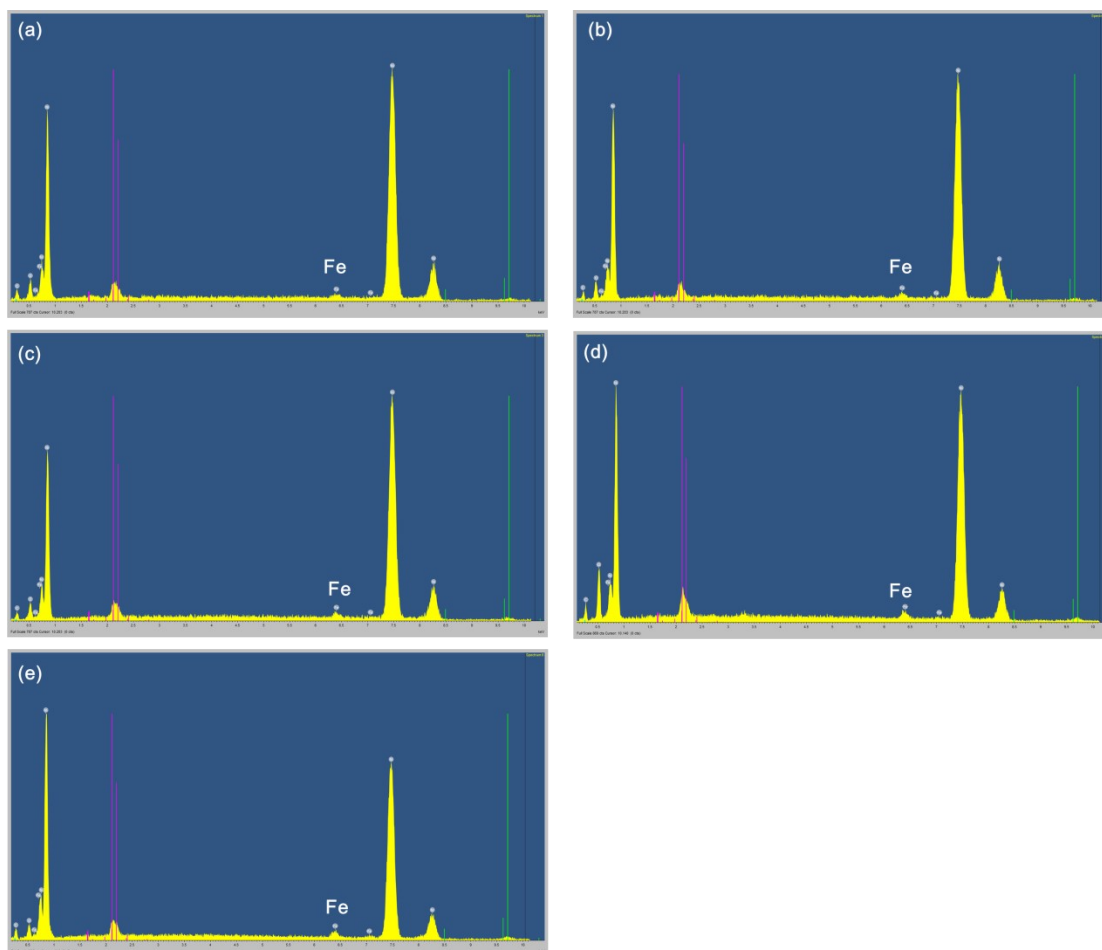

Figure S6 EDX results of Fe<sub>3</sub>O<sub>4</sub>-GO-Ni@cotton threads synthesized with GO concentrations of (a) 0 mg/L, (b) 12.5 mg/L, (c) 25 mg/L, (d) 50 mg/L, and (e) 125 mg/L.

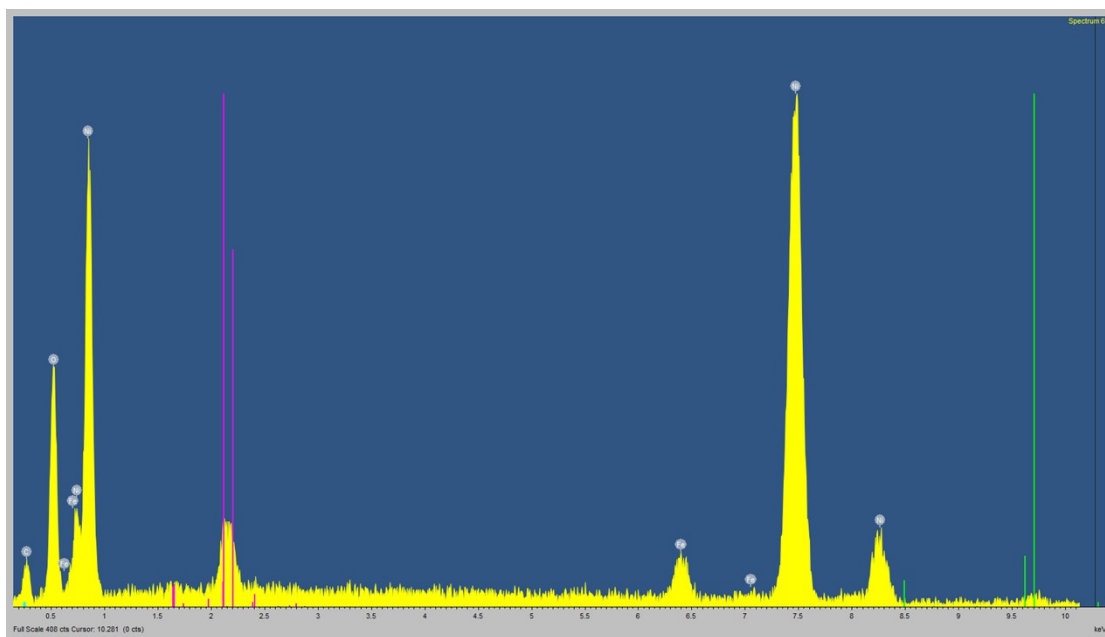

Figure S7 EDX result of  $\text{Fe}_3\text{O}_4\text{-GO-Ni@ cotton}$  threads synthesized with the concentration of hollow  $\text{Fe}_3\text{O}_4$  microspheres of 1.0 g/L.

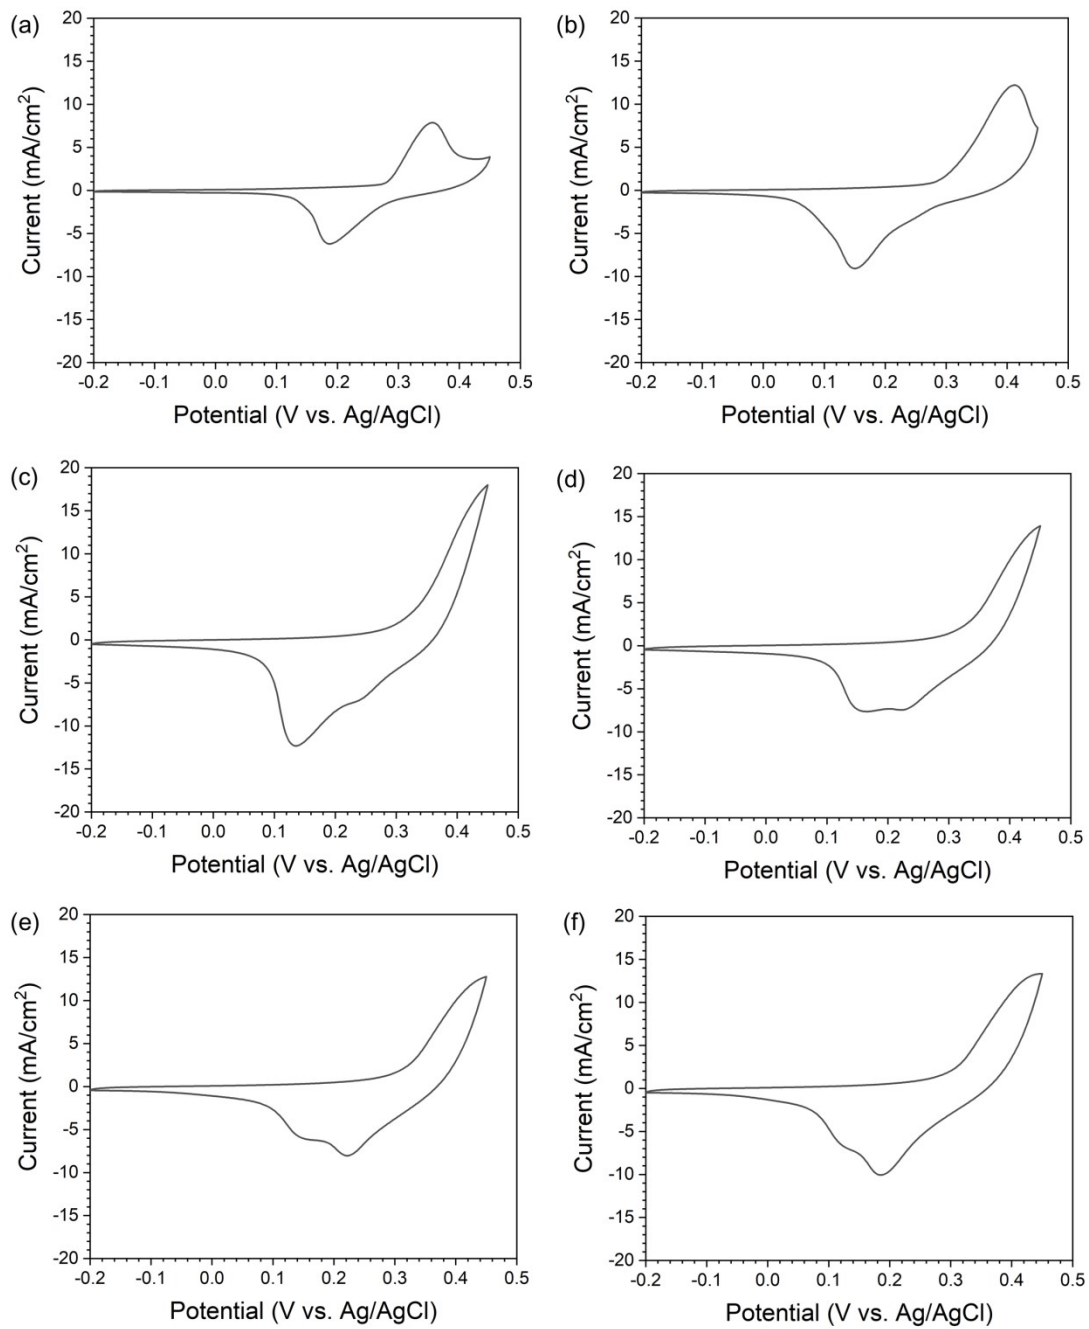

Figure S8 CV curves of  $\text{Fe}_3\text{O}_4\text{-GO-Ni@cotton}$  electrode at different cycles during the long cycle test ((a) 1<sup>st</sup> cycle, (b) 100<sup>th</sup> cycle, (c) 1,000<sup>th</sup> cycle, (d) 2,000<sup>th</sup> cycle, (e) 5,000<sup>th</sup> cycle, and (f) 10,000<sup>th</sup> cycle).

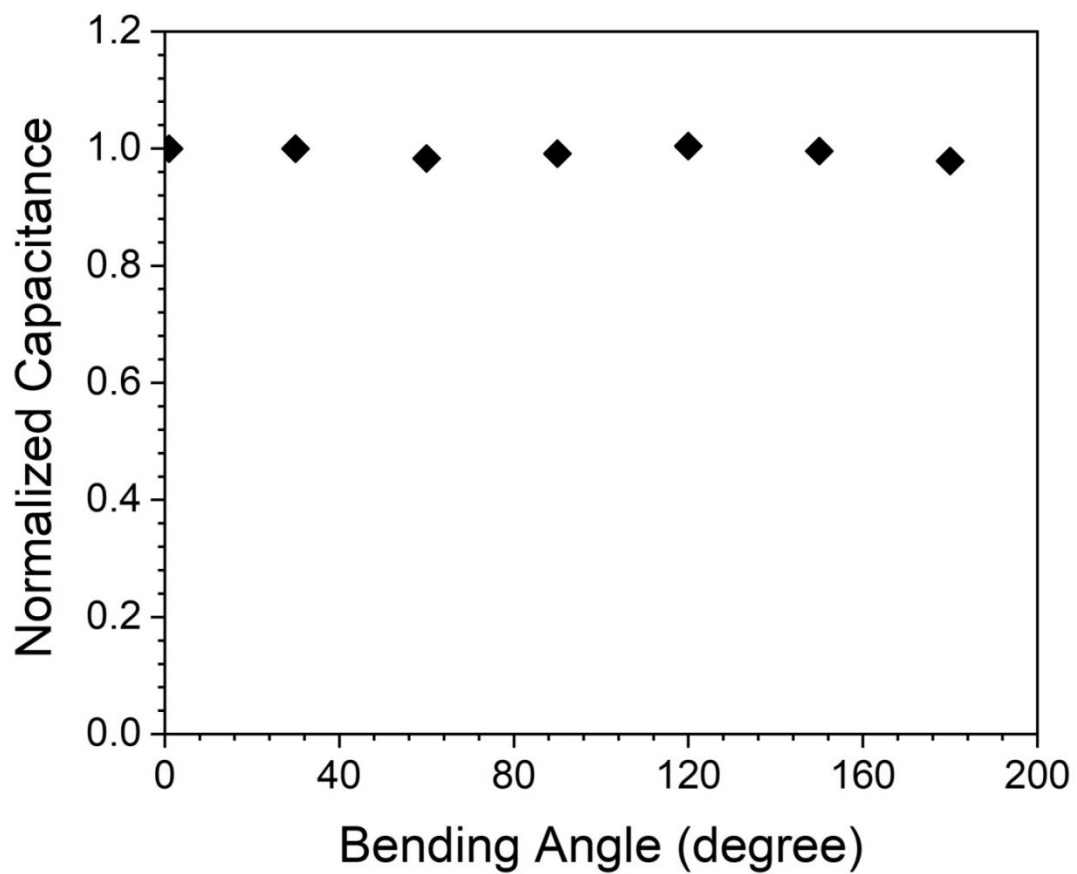

Figure S9 Capacitance retention of the flexible solid-state  $\text{Fe}_3\text{O}_4\text{-GO-Ni@ cotton}$  supercapacitor against the bending angle.
